# Supplementary material
Source: PubMed Central journal article supplement (PMC2669022)
Supplement: E08-10-1046_1.pdf [file E08-10-1046_1.pdf]

Table S1 *A. nidulans* strains used in this study

| Strain | Genotype                                                                                                                                                                                                                                                                                                                                               | Derivation            |
|--------|--------------------------------------------------------------------------------------------------------------------------------------------------------------------------------------------------------------------------------------------------------------------------------------------------------------------------------------------------------|-----------------------|
| CDS246 | <i>pyrG89</i> ; <i>wA3</i> ; <i>pyroA4</i> ; GFP- <i>sonBn</i> <sup>Nup98</sup> <i>sonBc</i> <sup>Nup96</sup> -mRFP:: <i>pyrG</i> <sup>Af</sup>                                                                                                                                                                                                        | De Souza et al., 2004 |
| CDS439 | <i>pyrG89</i> ( <i>yA2</i> <sup>1</sup> ); <i>wA3</i> ; <i>gdpd</i> :: <i>stuA</i> C-term-DsRedT4 (NLS-DsRed); <i>pyroA4</i> ; <i>sonBc</i> <sup>Nup96</sup> -GFP:: <i>pyrG</i> <sup>Af</sup>                                                                                                                                                          | CDS396 x CDS283       |
| CDS621 | ( <i>pyrG89</i> <sup>1</sup> ); <i>pyroA4</i> ; An- <i>nup49</i> -chRFP:: <i>pyrG</i> <sup>Af</sup> ; <i>fwA1</i> An- <i>gle1</i> -GFP:: <i>pyrG</i> <sup>Af</sup>                                                                                                                                                                                     | SO602 x CDS590        |
| CDS767 | <i>pyrG89</i> ; <i>wA3</i> ; <i>argB2</i> ; $\Delta$ <i>mad2</i> :: <i>pyrG</i> ; An- <i>fib</i> -chRFP:: <i>pyrG</i> <sup>Af</sup> GFP- <i>tubA</i> <i>chaA1</i>                                                                                                                                                                                      | CDS596 x CDS410a      |
| CDS778 | <i>pyrG89</i> $\Delta$ <i>yA</i> ::NLS-DsRed; <i>pyroA4</i> ; $\Delta$ <i>mad2</i> :: <i>pyrG</i> ; An- <i>bop1</i> -GFP:: <i>pyrG</i> <sup>Af</sup>                                                                                                                                                                                                   | LU398 x CDS459        |
| CDS863 | <i>pyrG89</i> ; <i>wA3</i> ; <i>argB2</i> ; An- <i>pol I</i> -chRFP:: <i>pyrG</i> <sup>Af</sup> An- <i>topo I</i> -GFP:: <i>pyrG</i> <sup>Af</sup> <i>chaA1 fwA1</i>                                                                                                                                                                                   | LU131 x LU439         |
| HA092  | <i>pyrG89</i> ; An- <i>erg4</i> -GFP:: <i>pyrG</i> <sup>Af</sup> <i>wA3</i> ; <i>argB2</i> ; $\Delta$ <i>nkuA</i> <sup>ku70</sup> :: <i>argB</i> <i>pyroA4</i> ; <i>sE15 nirA14 chaA1 fwA1</i>                                                                                                                                                         | SO451 transformant    |
| HA112  | <i>pabaA1 yA2</i> ( <i>pyrG89</i> <sup>1</sup> ); An- <i>erg4</i> -GFP:: <i>pyrG</i> <sup>Af</sup> ; ( <i>argB2</i> <sup>1</sup> ), <i>pyroA4</i> $\Delta$ <i>nkuA</i> <sup>ku70</sup> :: <i>argB</i> ; <i>histone-H1</i> -mRFP:: <i>pyrG</i> <sup>Af</sup>                                                                                            | HA092 x HA088         |
| LU105  | <i>pyrG89</i> ; <i>wA3</i> ; <i>argB2</i> ; <i>pyroA4</i> ; An- <i>erg4</i> -mRFP:: <i>pyrG</i> <sup>Af</sup> ; An- <i>fib</i> -GFP:: <i>pyrG</i> <sup>Af</sup> ( <i>chaA1</i> <sup>1</sup> <i>fwA1</i> <sup>1</sup> <i>nirA14</i> <sup>1</sup> <i>sE15</i> <sup>1</sup> )                                                                             | LU103 X LU161         |
| LU118  | <i>pyrG89</i> ; <i>wA3</i> ; <i>argB2</i> ; $\Delta$ <i>nkuA</i> <sup>ku70</sup> :: <i>argB</i> <i>pyroA4</i> ; An- <i>topo1</i> -GFP:: <i>pyrG</i> <sup>Af</sup> <i>sE15 nirA14 chaA1 fwA1</i>                                                                                                                                                        | SO451 transformant    |
| LU124  | <i>pyrG89</i> ; <i>wA3</i> ; <i>argB2</i> :: <i>gdpd</i> :: <i>stuA</i> C-term-DsRedT4- <i>argB</i> (NLS-DsRed); <i>pyroA4</i> ( $\Delta$ <i>nkuA</i> <sup>ku70</sup> :: <i>argB</i> <sup>1</sup> ) An- <i>fib</i> -GFP:: <i>pyrG</i> <sup>Af</sup> <i>chaA1 (sE15</i> <sup>1</sup> <i>nirA14</i> <sup>1</sup> )                                       | LU161 X CDS396        |
| LU125  | <i>pabaA1 pyrG89</i> ; <i>wA3</i> ; <i>argB2</i> ; <i>histone-H1</i> -mRFP:: <i>pyrG</i> <sup>Af</sup> ; An- <i>fib</i> -GFP:: <i>pyrG</i> <sup>Af</sup> ( <i>fwA1</i> <sup>1</sup> <i>chaA1</i> <sup>1</sup> <i>nirA14</i> <sup>1</sup> <i>sE15</i> <sup>1</sup> )                                                                                    | LU161 X LO1353        |
| LU126  | <i>pyrG89</i> ; <i>wA3</i> ; <i>argB2</i> ; An- <i>nrap</i> -GFP:: <i>pyrG</i> <sup>Af</sup> ; <i>histone-H1</i> -mRFP:: <i>pyrG</i> <sup>Af</sup> ; ( <i>fwA1</i> <sup>1</sup> <i>chaA1</i> <sup>1</sup> <i>nirA14</i> <sup>1</sup> <i>sE15</i> <sup>1</sup> )                                                                                        | LU116 X LO1353        |
| LU132  | <i>pyrG89</i> ; <i>wA3</i> ; <i>argB2</i> ; An- <i>topo1</i> -GFP:: <i>pyrG</i> <sup>Af</sup> An- <i>fib</i> -chRFP:: <i>pyrG</i> <sup>Af</sup> <i>fwA1 chaA1 (sE15</i> <sup>1</sup> <i>nirA14</i> <sup>1</sup> )                                                                                                                                      | LU118 X CDS410a       |
| LU135  | <i>pyrG89</i> ; <i>wA3</i> ; <i>argB2</i> ; <i>histone-H1</i> -mRFP:: <i>pyrG</i> <sup>Af</sup> ; An- <i>topo1</i> -GFP:: <i>pyrG</i> <sup>Af</sup> ( <i>fwA1</i> <sup>1</sup> <i>chaA1</i> <sup>1</sup> <i>sE15</i> <sup>1</sup> <i>nirA14</i> <sup>1</sup> )                                                                                         | LU119 X LO1353        |
| LU161  | <i>pyrG89</i> ; <i>wA3</i> ; <i>argB2</i> ; $\Delta$ <i>nkuA</i> <sup>ku70</sup> :: <i>argB</i> <i>pyroA4</i> ; An- <i>fib</i> -GFP:: <i>pyrG</i> <sup>Af</sup> <i>sE15 nirA14 chaA1 fwA1</i>                                                                                                                                                          | SO451 transformant    |
| LU178  | <i>pyrG89</i> ; <i>wA3</i> ; <i>argB2</i> ; <i>histone-H1</i> -mRFP:: <i>pyrG</i> <sup>Af</sup> ; An- <i>cgrA</i> -GFP:: <i>pyrG</i> <sup>Af</sup> ; ( <i>fwA1</i> <sup>1</sup> <i>chaA1</i> <sup>1</sup> <i>nirA14</i> <sup>1</sup> <i>sE15</i> <sup>1</sup> )                                                                                        | LU152 X LO1353        |
| LU193  | <i>pabaA1 pyrG89</i> ; <i>wA3</i> ; <i>argB2</i> ; <i>pyroA4</i> ; <i>histone-H1</i> -mRFP:: <i>pyrG</i> <sup>Af</sup> ; An- <i>bop1</i> -GFP:: <i>pyrG</i> <sup>Af</sup> <i>sE15</i> ; ( <i>fwA1</i> <sup>1</sup> <i>chaA1</i> <sup>1</sup> <i>nirA14</i> <sup>1</sup> )                                                                              | LU81 X LO1353         |
| LU359  | <i>pyrG89</i> ; <i>wA3</i> ; <i>argB2</i> :: <i>gdpd</i> :: <i>stuA</i> C-term-DsRedT4- <i>argB</i> (NLS-DsRed); <i>pyroA4</i> ( $\Delta$ <i>nkuA</i> <sup>ku70</sup> :: <i>argB</i> <sup>1</sup> ); $\Delta$ An- <i>mad2</i> :: <i>pyrG</i> ; An- <i>fib</i> -GFP:: <i>pyrG</i> <sup>Af</sup> ( <i>sE15</i> <sup>1</sup> <i>nirA14</i> <sup>1</sup> ) | LU124 X $\Delta$ Md2  |
| LU398  | <i>pyrG89</i> $\Delta$ <i>yA</i> ::NLS-DsRed; <i>argB2</i> ; <i>pyroA4</i> ; <i>nicB8</i> ; An- <i>bop1</i> -GFP:: <i>pyrG</i> <sup>Af</sup> <i>bimG11 (nirA14</i> <sup>1</sup> )                                                                                                                                                                      | LU377 X $\Delta$ Md2  |
| LU437  | <i>pyrG89</i> ; <i>wA3</i> ; <i>argB2</i> ; $\Delta$ <i>nkuA</i> <sup>ku70</sup> :: <i>argB</i> <i>pyroA4</i> ; An- <i>pol I</i> -GFP:: <i>pyrG</i> <sup>Af</sup> <i>sE15 nirA14 chaA1 fwA1</i>                                                                                                                                                        | SO451 transformant    |
| LU451  | <i>pabaA1 pyrG89</i> ; <i>pyroA4</i> ; $\Delta$ <i>mad2</i> :: <i>pyrG</i> An- <i>nup49</i> -chRFP:: <i>pyrG</i> <sup>Af</sup> ; An- <i>bop1</i> -GFP:: <i>pyrG</i> <sup>Af</sup> <i>chaA1 (sE15</i> <sup>1</sup> )                                                                                                                                    | LU399 X CDS590        |
| LU456  | <i>pabaA1 pyrG89</i> ; <i>pyroA4</i> ; An- <i>nup170</i> -chRFP:: <i>pyrG</i> <sup>Af</sup> ; $\Delta$ <i>mad2</i> :: <i>pyrG</i> ; <i>riboB2</i> An- <i>bop1</i> -GFP:: <i>pyrG</i> <sup>Af</sup> ( <i>sE15</i> <sup>1</sup> )                                                                                                                        | LU399 X HA313         |
| LU458  | <i>pyrG89</i> ; ( <i>nimT23</i> <sup>1</sup> ); <i>alcA</i> :: <i>nd-nimE</i> <sup>cyclinB</sup> at <i>argB</i> ; ( <i>bimG11</i> <sup>1</sup> ) An- <i>fib</i> -chRFP:: <i>pyrG</i> <sup>Af</sup> An- <i>bop1</i> -GFP:: <i>pyrG</i> <sup>Af</sup> <i>chaA1 (nirA14</i> <sup>1</sup> )                                                                | LU395 x CDS410a       |
| SO451  | <i>pyrG89</i> ; <i>wA3</i> ; <i>argB2</i> ; $\Delta$ <i>nkuA</i> <sup>ku70</sup> :: <i>argB</i> <i>pyroA4</i> ; <i>sE15 nirA14 chaA1 fwA1</i>                                                                                                                                                                                                          | Osmani et al., 2006   |
| SO602  | ( <i>pyrG89</i> <sup>1</sup> ); <i>wA3</i> ; <i>argB2</i> ; <i>sE15</i> An- <i>gle1</i> -GFP:: <i>pyrG</i> <sup>Af</sup>                                                                                                                                                                                                                               | Osmani et al., 2006   |

<sup>1</sup> In some strains we have not confirmed some markers which could be covered by or recessive to other markers in the strain.

**Supplementary Figure 1.** Mitotic segregation of An-Pol I. (A) Time lapse imaging of An-Pol I-GFP during mitosis. (B) An-Pol I-chRFP together with An-Topo I-GFP demonstrating that An-Pol I-chRFP co-localizes with the An-Topo I-GFP foci (arrowheads) as they segregate. (C) An-Topo I-GFP together with An-Fib-chRFP during mitotic exit demonstrating that An-Fib-chRFP accumulates at the segregated An-Topo I-GFP foci which represent the NORs. Arrowheads indicate the segregated Topo I foci and the initial accumulation of An-Fib at these foci. This is highlighted in the kymographs of the time course collecting images every 7 sec. Bars ~5  $\mu\text{m}$ .

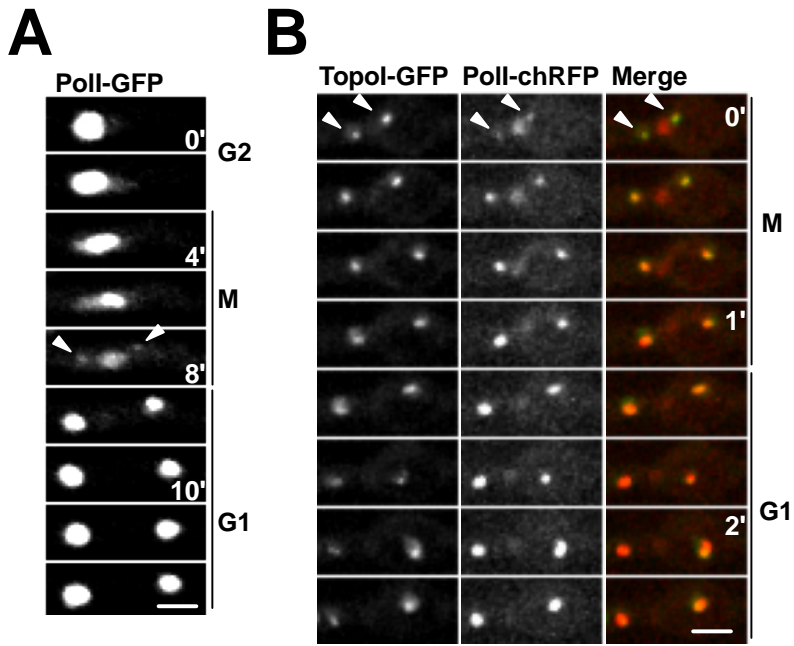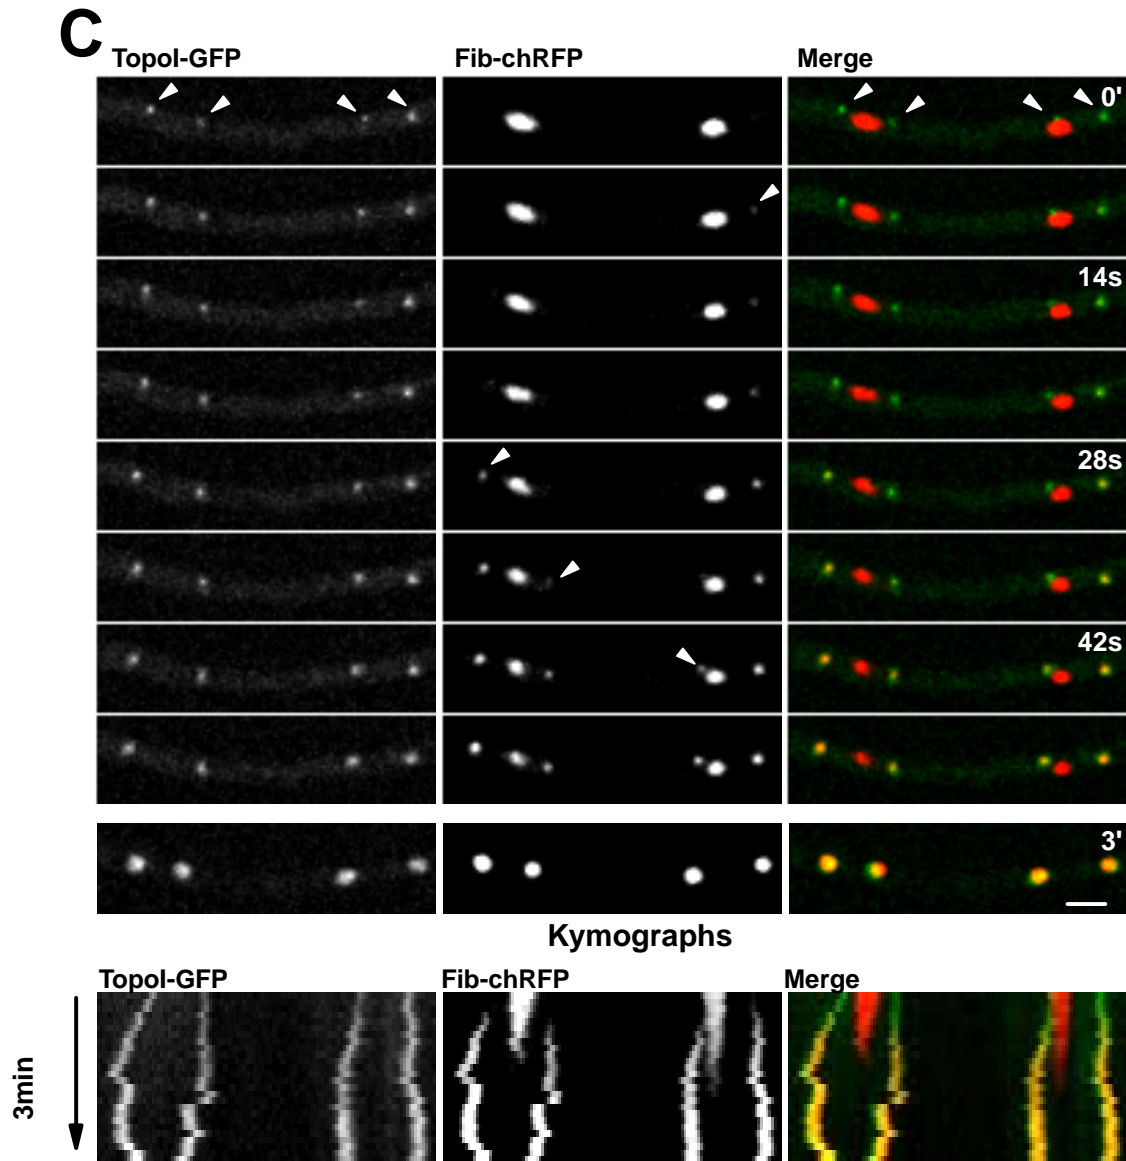

Supplemental Figure S1

### **Supplemental video files.**

Video1.mov shows time-lapse imaging of An-Erg24-GFP location during mitosis (Figure 1D). Images were collected every 1 min and are displayed at 2 fps.

Video2.mov shows An-Fib-GFP together with histone H1-mRFP during mitosis (Figure 2B). Images were collected every 40 sec and are displayed at 2 fps.

Video3.mov shows An-Fib-chRFP together with An-Bop1-GFP during mitosis (Figure 3B). Images were collected every 20 sec and are displayed at 2 fps.

Video4.mov shows that when An-Topo I-GFP (mitotic NOR marker) segregates in anaphase, it is removed from the nucleolus (Figure 4D). When An-Fib-chRFP then begins to disassemble from the nucleolus, it is imported into daughter nuclei and accumulates around An-Topo I-GFP at the NORs. Images were collected every 45 sec and are displayed at 2 fps.

Video5.mov shows NLS-DsRed and An-Fib-GFP (Figure 5C) distribution during SIM (*mad2Δ* + benomyl). Images were collected every 45 sec and are displayed at 2 fps.

Video6.mov shows NLS-DsRed and An-Bop1-GFP (Figure 5D) distribution during SIM (*mad2Δ* + benomyl). Images were collected every 1 min and are displayed at 2 fps.

Video7.mov shows An-Topo I-GFP (mitotic NOR marker) and An-Fib-chRFP (Figure 7B) distribution during SIM (*mad2Δ* + benomyl). Images were collected every 1 min and are displayed at 2 fps.

Video8.mov shows An-Nup49-chRFP and An-Bop1-GFP distribution (Figure 8A) during SIM (*mad2Δ* + benomyl). Images were collected every 30 sec and are displayed at 2 fps.

Video9.mov shows An-Nup170-chRFP and An-Bop1-GFP distribution (Figure 8B) during SIM (*mad2Δ* + benomyl). Images were collected every 1 min and are displayed at 2 fps.
